# Supplementary material for: JAK1 truncating mutations in gynecologic cancer define new role of cancer-associated protein tyrosine kinase aberrations
Source: PubMed Central journal article supplement — Sci Rep. 2013 Oct 24;3:3042. doi: 10.1038/srep03042 (PMC3807107; doi:10.1038/srep03042), 2013-10-24
Supplement: srep03042-s1.pdf [file srep03042-s1.pdf]

## **Supplementary Information**

### **JAK1 truncating mutations in gynecologic cancer define new role of cancer-associated protein tyrosine kinase aberrations**

Yuan Ren, Yonghong Zhang, Richard Z. Liu, David A. Fenstermacher, Kenneth L. Wright,  
Jamie K. Teer, and Jie Wu

H. Lee Moffitt Cancer Center and Research Institute, Tampa, FL 33612, USA

Supplementary Tables 1-4

Supplementary Figures 1-4

Supplementary Figure legends

sTable 1: Complete list of samples with JAK1 mutations in the TCC project

| Type             | Total case  | NS mutation  |          | Truncation rate |     | Case         | NS mutation | Truncation  |
|------------------|-------------|--------------|----------|-----------------|-----|--------------|-------------|-------------|
|                  |             | NS mutation* | rate (%) | Truncation*     | (%) |              |             |             |
| Brain            | 79          | 1            | 1.2      | 0               |     |              |             |             |
| Breast           | 427         | 10           | 2.3      | 1               | 0.2 |              |             |             |
| Cervix           | 49          | 2            | 4.1      | 2               | 4.1 | Combined GYN | 635         | 53** (8.3%) |
| Endometrium      | 200         | 24           | 12       | 19              | 9.5 |              |             |             |
| Gynecologic      | 1           | 0            |          | 0               |     |              |             |             |
| Ovary            | 235         | 7            | 3        | 1               | 0.4 |              |             |             |
| Uterus           | 148         | 19           | 12.8     | 14***           | 9.5 |              |             |             |
| Vagina           | 1           | 0            |          | 0               |     |              |             |             |
| Vulva            | 1           | 1            | 100      | 0               |     |              |             |             |
| Esophagus        | 44          | 2            | 4.5      | 0               |     |              |             |             |
| Gallbladder      | 2           | 1            | 50       | 0               |     |              |             |             |
| HEME-CLL         | 94          | 2            | 21.3     | 0               |     |              |             |             |
| Kidney           | 243         | 8            | 3.3      | 0               |     |              |             |             |
| Large bowel      | 460         | 22           | 4.8      | 8               | 1.7 | Combined CRC | 539         | 23 (4.3%)   |
| Small Intestine  | 7           | 0            |          | 0               |     |              |             |             |
| Rectum-anus      | 72          | 1            | 1.4      | 1               | 1.5 |              |             |             |
| Lung             | 603         | 14           | 2.3      | 2               | 0.3 |              |             |             |
| Pancreas         | 161         | 4            | 2.5      | 1               | 0.6 |              |             |             |
| Prostate         | 52          | 1            | 1.9      | 0               |     |              |             |             |
| Skin             | 209         | 10           | 4.8      | 1               | 0.4 |              |             |             |
| Soft tissue      | 45          | 2            | 4.4      | 0               |     |              |             |             |
| Stomach          | 55          | 4            | 7.3      | 2               | 3.6 |              |             |             |
| Adrenal          | 1           | 0            |          |                 |     |              |             |             |
| Ampulla Of Vater | 1           | 0            |          |                 |     |              |             |             |
| Bladder          | 6           | 0            |          |                 |     |              |             |             |
| Bone             | 2           | 0            |          |                 |     |              |             |             |
| HEME-AML         | 36          | 0            |          |                 |     |              |             |             |
| Larynx           | 24          | 0            |          |                 |     |              |             |             |
| Lymph Nodes      | 2           | 0            |          |                 |     |              |             |             |
| Mandible         | 3           | 0            |          |                 |     |              |             |             |
| Maxilla          | 2           | 0            |          |                 |     |              |             |             |
| Mesenteric       | 3           | 0            |          |                 |     |              |             |             |
| Nose             | 2           | 0            |          |                 |     |              |             |             |
| Oral Cavity      | 30          | 0            |          |                 |     |              |             |             |
| Penis-Scrotum    | 1           | 0            |          |                 |     |              |             |             |
| Peritoneum       | 9           | 0            |          |                 |     |              |             |             |
| Pharynx          | 3           | 0            |          |                 |     |              |             |             |
| Pleura           | 3           | 0            |          |                 |     |              |             |             |
| Renal Pelvis     | 5           | 0            |          |                 |     |              |             |             |
| Retroperitoneum  | 3           | 0            |          |                 |     |              |             |             |
| Salivary Gland   | 7           | 0            |          |                 |     |              |             |             |
| Spleen           | 2           | 0            |          |                 |     |              |             |             |
| Testes           | 1           | 0            |          |                 |     |              |             |             |
| Thoracic         | 1           | 0            |          |                 |     |              |             |             |
| Thyroid          | 12          | 0            |          |                 |     |              |             |             |
| Tongue           | 5           | 0            |          |                 |     |              |             |             |
| Tonsils          | 1           | 0            |          |                 |     |              |             |             |
| <b>Total</b>     | <b>3274</b> | <b>134</b>   |          | <b>52</b>       |     |              |             |             |

\* Some tumors have more than 1 mutations. The total number of ns mutations detected is 166.

\*\* The number of truncating mutations detected in GYN cancer is 78.

\*\*\*All are endometrial adenocarcinoma except 1 case that medical record is not available

sTable 2: JAK1 mutations in CCLE

| Protein Change | Chror | Start    | End      | Sample                          | NCBI Build | Strand | Variant Classification  | Variant | RefE | Tun | Turr | dbS | Method    | Oncomap | Assays |
|----------------|-------|----------|----------|---------------------------------|------------|--------|-------------------------|---------|------|-----|------|-----|-----------|---------|--------|
|                | 1     | 65300158 | 65300158 | TF1 HAEMATPOIETIC AND LYMPHOII  | 37         | +      | UTR 3                   | SNP     | C    | G   | G    |     | Hybrid_NA |         |        |
|                | 1     | 65300162 | 65300162 | JHUJEM7 ENDOMETRIUM             | 37         | +      | UTR 3                   | SNP     | A    | C   | C    |     | Hybrid_NA |         |        |
|                | 1     | 65300199 | 65300199 | SKMEL2 SKIN                     | 37         | +      | UTR 3                   | SNP     | G    | A   | A    |     | Hybrid_NA |         |        |
| p.R1113H       | 1     | 65301110 | 65301110 | 639V URINARY TRACT              | 37         | +      | Missense Mutation       | SNP     | C    | T   | T    |     | Hybrid_NA |         |        |
| p.E1051Q       | 1     | 65301888 | 65301888 | HT55 LARGE INTESTINE            | 37         | +      | Missense Mutation       | SNP     | C    | G   | G    |     | Hybrid_NA |         |        |
| p.G990_splice  | 1     | 65303789 | 65303789 | MFE319 ENDOMETRIUM              | 37         | +      | Splice Site SNP         | SNP     | T    | C   | C    |     | Hybrid_NA |         |        |
| p.K982T        | 1     | 65304170 | 65304170 | EM2 HAEMATPOIETIC AND LYMPHOI   | 37         | +      | Missense Mutation       | SNP     | T    | G   | G    |     | Hybrid_NA |         |        |
| p.P969S        | 1     | 65304210 | 65304210 | SJRH30 SOFT TISSUE              | 37         | +      | Missense Mutation       | SNP     | G    | A   | A    |     | Hybrid_NA |         |        |
| p.E966V        | 1     | 65304218 | 65304218 | HPBALL HAEMATPOIETIC AND LYMP   | 37         | +      | Missense Mutation       | SNP     | T    | A   | A    |     | Hybrid_NA |         |        |
| p.G948R        | 1     | 65305286 | 65305286 | SW1116 LARGE INTESTINE          | 37         | +      | Missense Mutation       | SNP     | C    | T   | T    |     | Hybrid_NA |         |        |
| p.I943N        | 1     | 65305300 | 65305300 | CW2 LARGE INTESTINE             | 37         | +      | Missense Mutation       | SNP     | A    | T   | T    |     | Hybrid_NA |         |        |
| p.K939E        | 1     | 65305313 | 65305313 | CAL51 BREAST                    | 37         | +      | Missense Mutation       | SNP     | T    | C   | C    |     | Hybrid_NA |         |        |
| p.V938A        | 1     | 65305315 | 65305315 | CCK81 LARGE INTESTINE           | 37         | +      | Missense Mutation       | SNP     | A    | G   | G    |     | Hybrid_NA |         |        |
| p.I928T        | 1     | 65305345 | 65305345 | KMS288M HAEMATPOIETIC AND LYM   | 37         | +      | Missense Mutation       | SNP     | A    | G   | G    |     | Hybrid_NA |         |        |
| p.K924fs       | 1     | 65305357 | 65305357 | RL952 ENDOMETRIUM               | 37         | +      | Frame Shift Del         | Del     | T    | -   | -    |     | Hybrid_NA |         |        |
| p.K908T        | 1     | 65305405 | 65305405 | HEC251 ENDOMETRIUM              | 37         | +      | Missense Mutation       | SNP     | T    | G   | G    |     | Hybrid_NA |         |        |
| p.A906V        | 1     | 65305411 | 65305411 | SNU1040 LARGE INTESTINE         | 37         | +      | Missense Mutation       | SNP     | G    | A   | A    |     | Hybrid_NA |         |        |
| p.R879C        | 1     | 65306942 | 65306942 | MOLM6 HAEMATPOIETIC AND LYMPI   | 37         | +      | Missense Mutation       | SNP     | G    | A   | A    |     | Hybrid_NA |         |        |
| p.K860fs       | 1     | 65306997 | 65306997 | HEC265 ENDOMETRIUM              | 37         | +      | Frame Shift Del         | Del     | T    | -   | -    |     | Hybrid_NA |         |        |
| p.K860fs       | 1     | 65306997 | 65306997 | RL952 ENDOMETRIUM               | 37         | +      | Frame Shift Del         | Del     | T    | -   | -    |     | Hybrid_NA |         |        |
| p.K860fs       | 1     | 65306997 | 65306997 | MFE296 ENDOMETRIUM              | 37         | +      | Frame Shift Del         | Del     | T    | -   | -    |     | Hybrid_NA |         |        |
| p.K860fs       | 1     | 65306997 | 65306997 | JHUJEM1 ENDOMETRIUM             | 37         | +      | Frame Shift Del         | Del     | T    | -   | -    |     | Hybrid_NA |         |        |
| p.K860fs       | 1     | 65306997 | 65306997 | HEC108 ENDOMETRIUM              | 37         | +      | Frame Shift Del         | Del     | T    | -   | -    |     | Hybrid_NA |         |        |
| p.K860fs       | 1     | 65306997 | 65306997 | SNU1 STOMACH                    | 37         | +      | Frame Shift Del         | Del     | T    | -   | -    |     | Hybrid_NA |         |        |
| p.K860fs       | 1     | 65306997 | 65306997 | TGROV1 OVARY                    | 37         | +      | Frame Shift Del         | Del     | T    | -   | -    |     | Hybrid_NA |         |        |
| p.K860fs       | 1     | 65306997 | 65306997 | CAL51 BREAST                    | 37         | +      | Frame Shift Del         | Del     | T    | -   | -    |     | Hybrid_NA |         |        |
| p.K860fs       | 1     | 65306997 | 65306997 | ISHIKAWAHERAKLIO02ER ENDOMETR   | 37         | +      | Frame Shift Del         | Del     | T    | -   | -    |     | Hybrid_NA |         |        |
| p.K860fs       | 1     | 65306997 | 65306997 | TOV21G OVARY                    | 37         | +      | Frame Shift Del         | Del     | T    | -   | -    |     | Hybrid_NA |         |        |
| p.N833S        | 1     | 65307190 | 65307190 | HCC95 LUNG                      | 37         | +      | Missense Mutation       | SNP     | T    | C   | C    |     | Hybrid_NA |         |        |
| p.L799P        | 1     | 65309754 | 65309754 | EN ENDOMETRIUM                  | 37         | +      | Missense Mutation       | SNP     | A    | G   | G    |     | Hybrid_NA |         |        |
| p.E765E        | 1     | 65309855 | 65309855 | BICR18 UPPER AERODIGESTIVE TRAC | 37         | +      | Synonymous              | SNP     | C    | T   | T    |     | Hybrid_NA |         |        |
| p.E751K        | 1     | 65310437 | 65310437 | HEC251 ENDOMETRIUM              | 37         | +      | Missense Mutation       | SNP     | C    | T   | T    |     | Hybrid_NA |         |        |
| p.R681W        | 1     | 65311270 | 65311270 | LS180 LARGE INTESTINE           | 37         | +      | Missense Mutation       | SNP     | G    | A   | A    |     | Hybrid_NA |         |        |
| p.V658F        | 1     | 65312347 | 65312347 | OCIM1 HAEMATPOIETIC AND LYMPH   | 37         | +      | Missense Mutation       | SNP     | C    | A   | A    |     | Hybrid_NA |         |        |
| p.C657R        | 1     | 65312350 | 65312350 | EN ENDOMETRIUM                  | 37         | +      | Missense Mutation       | SNP     | A    | G   | G    |     | Hybrid_NA |         |        |
| p.Y654F        | 1     | 65312358 | 65312358 | HUT78 HAEMATPOIETIC AND LYMPH   | 37         | +      | Missense Mutation       | SNP     | T    | A   | A    |     | Hybrid_NA |         |        |
| p.G610*        | 1     | 65313286 | 65313286 | HEC251 ENDOMETRIUM              | 37         | +      | Nonsense Mutation       | SNP     | C    | A   | A    |     | Hybrid_NA |         |        |
| p.T593M        | 1     | 65313336 | 65313336 | OC316 OVARY                     | 37         | +      | Missense Mutation       | SNP     | G    | A   | A    |     | Hybrid_NA |         |        |
| p.S577Q        | 1     | 65316512 | 65316512 | HEC6 ENDOMETRIUM                | 37         | +      | Missense Mutation       | SNP     | C    | T   | T    |     | Hybrid_NA |         |        |
| p.T533M        | 1     | 65321242 | 65321242 | MDAPCA2B PROSTATE               | 37         | +      | Missense Mutation       | SNP     | G    | A   | A    |     | Hybrid_NA |         |        |
| p.H525Y        | 1     | 65321267 | 65321267 | NCIH1793 LUNG                   | 37         | +      | Missense Mutation       | SNP     | G    | A   | A    |     | Hybrid_NA |         |        |
| p.G511D        | 1     | 65321308 | 65321308 | HEC151 ENDOMETRIUM              | 37         | +      | Missense Mutation       | SNP     | C    | T   | T    |     | Hybrid_NA |         |        |
| p.C445_splice  | 1     | 65325786 | 65325786 | PK45H PANCREAS                  | 37         | +      | Splice Site SNP         | SNP     | A    | G   | G    |     | Hybrid_NA |         |        |
| p.P430fs       | 1     | 65325832 | 65325833 | LNCAPCLONEFGC PROSTATE          | 37         | +      | Frame Shift Ins         | Ins     | -    | G   | G    |     | Hybrid_NA |         |        |
| p.P430fs       | 1     | 65325832 | 65325833 | MFE319 ENDOMETRIUM              | 37         | +      | Frame Shift Ins         | Ins     | -    | G   | G    |     | Hybrid_NA |         |        |
| p.P430fs       | 1     | 65325832 | 65325833 | HEC265 ENDOMETRIUM              | 37         | +      | Frame Shift Ins         | Ins     | -    | G   | G    |     | Hybrid_NA |         |        |
| p.P430fs       | 1     | 65325833 | 65325833 | HEC1B ENDOMETRIUM               | 37         | +      | Frame Shift Del         | Del     | G    | -   | -    |     | Hybrid_NA |         |        |
| p.A428P        | 1     | 65325840 | 65325840 | CW2 LARGE INTESTINE             | 37         | +      | Missense Mutation       | SNP     | C    | G   | G    |     | Hybrid_NA |         |        |
| p.L423V        | 1     | 65325855 | 65325855 | NCIH2066 LUNG                   | 37         | +      | Missense Mutation       | SNP     | G    | C   | C    |     | Hybrid_NA |         |        |
| p.S383G        | 1     | 65330499 | 65330499 | HCC4006 LUNG                    | 37         | +      | Missense Mutation       | SNP     | T    | C   | C    |     | Hybrid_NA |         |        |
| p.P370S        | 1     | 65330538 | 65330538 | CHL1 SKIN                       | 37         | +      | Missense Mutation       | SNP     | G    | A   | A    |     | Hybrid_NA |         |        |
| p.K345fs       | 1     | 65330610 | 65330611 | JHUJEM1 ENDOMETRIUM             | 37         | +      | Frame Shift Ins         | Ins     | -    | T   | T    |     | Hybrid_NA |         |        |
| p.R343Q        | 1     | 65330618 | 65330618 | SW1417 LARGE INTESTINE          | 37         | +      | Missense Mutation       | SNP     | C    | T   | T    |     | Hybrid_NA |         |        |
| p.N339fs       | 1     | 65330630 | 65330630 | TOV21G OVARY                    | 37         | +      | Frame Shift Del         | Del     | T    | -   | -    |     | Hybrid_NA |         |        |
| p.G282C        | 1     | 65332695 | 65332695 | CW2 LARGE INTESTINE             | 37         | +      | Missense Mutation       | SNP     | C    | A   | A    |     | Hybrid_NA |         |        |
| p.D246fs       | 1     | 65332803 | 65332803 | SNUC2A LARGE INTESTINE          | 37         | +      | Frame Shift Del         | Del     | C    | -   | -    |     | Hybrid_NA |         |        |
| p.L235V        | 1     | 65332836 | 65332836 | KNS60 CENTRAL NERVOUS SYSTEM    | 37         | +      | Missense Mutation       | SNP     | G    | C   | C    |     | Hybrid_NA |         |        |
| p.S228C        | 1     | 65332856 | 65332856 | R55 PLEURA                      | 37         | +      | Missense Mutation       | SNP     | G    | C   | C    |     | Hybrid_NA |         |        |
| p.N226S        | 1     | 65332862 | 65332862 | SNU1105 CENTRAL NERVOUS SYSTEI  | 37         | +      | Missense Mutation       | SNP     | T    | C   | C    |     | Hybrid_NA |         |        |
| p.N226S        | 1     | 65332862 | 65332862 | SQ1 LUNG                        | 37         | +      | Missense Mutation       | SNP     | T    | C   | C    |     | Hybrid_NA |         |        |
| p.E223*        | 1     | 65332872 | 65332872 | VMRCLCD LUNG                    | 37         | +      | Nonsense Mutation       | SNP     | C    | A   | A    |     | Hybrid_NA |         |        |
| p.L166S        | 1     | 65335144 | 65335144 | SNU1040 LARGE INTESTINE         | 37         | +      | Missense Mutation       | SNP     | A    | G   | G    |     | Hybrid_NA |         |        |
| p.Q161*        | 1     | 65339055 | 65339055 | NCIH1563 LUNG                   | 37         | +      | Nonsense Mutation       | SNP     | G    | A   | A    |     | Hybrid_NA |         |        |
| p.K142fs       | 1     | 65339110 | 65339111 | EN ENDOMETRIUM                  | 37         | +      | Frame Shift Ins         | Ins     | -    | T   | T    |     | Hybrid_NA |         |        |
| p.K142fs       | 1     | 65339110 | 65339111 | MFE319 ENDOMETRIUM              | 37         | +      | Frame Shift Ins         | Ins     | -    | T   | T    |     | Hybrid_NA |         |        |
| p.K142fs       | 1     | 65339111 | 65339111 | LNCAPCLONEFGC PROSTATE          | 37         | +      | Frame Shift Del         | Del     | T    | -   | -    |     | Hybrid_NA |         |        |
| p.K142fs       | 1     | 65339111 | 65339111 | HEC151 ENDOMETRIUM              | 37         | +      | Frame Shift Del         | Del     | T    | -   | -    |     | Hybrid_NA |         |        |
| p.K142fs       | 1     | 65339111 | 65339111 | 22RV1 PROSTATE                  | 37         | +      | Frame Shift Del         | Del     | T    | -   | -    |     | Hybrid_NA |         |        |
| p.D82A         | 1     | 65344792 | 65344792 | EN ENDOMETRIUM                  | 37         | +      | Missense Mutation       | SNP     | T    | G   | G    |     | Hybrid_NA |         |        |
| p.I62V         | 1     | 65348981 | 65348981 | NCIH1915 LUNG                   | 37         | +      | Missense Mutation       | SNP     | T    | C   | C    |     | Hybrid_NA |         |        |
|                | 1     | 65351955 | 65351955 | HGC27 STOMACH                   | 37         | +      | De novo Start OutOfFram | SNP     | G    | T   | T    |     | Hybrid_NA |         |        |
|                | 1     | 65351985 | 65351985 | COLO783 SKIN                    | 37         | +      | UTR 5                   | SNP     | G    | A   | A    |     | Hybrid_NA |         |        |
|                | 1     | 65352024 | 65352024 | SNU1040 LARGE INTESTINE         | 37         | +      | UTR 5                   | SNP     | G    | A   | A    |     | Hybrid_NA |         |        |

73 JAK1 mutations 58 cell lines  
72 non-synonymous mutations in 57 cell lines  
25 truncating mutations in 19 cell lines  
17 frame shift mutation in 12 GYN cancer cell lines  
1 splice site mutation in GYN  
1 nonsense mutation in GYN  
8 missense mutation in GYN cancer  
% JAK1 mutations are truncating mutations: 28 of 72 =38.9%  
% cell lines with JAK1 truncating mutations are GYN cells: 13/19 =68.4%

Yellow: Truncating mutations in GYN cancer  
Orange: Missense mutations in GYN cancer

sTable 3: JAK2 mutations in the TCC project

|             | Total case* | NS mutation case | NS mutation rate (%) | Truncation case | Truncation rate (%) | Case         | NS mutation | Truncation |
|-------------|-------------|------------------|----------------------|-----------------|---------------------|--------------|-------------|------------|
| Brain       | 79          | 1                | 1.3                  | 0               |                     |              |             |            |
| Breast      | 427         | 32               | 7.5                  | 0               |                     |              |             |            |
| Cervix      | 49          | 3                | 6.1                  | 1               | 2                   | Combined GYN | 632         | 60 (9.4%)  |
| Endometrium | 200         | 23               | 11.5                 | 4               | 2                   |              |             |            |
| Ovary       | 235         | 15               | 6.4                  | 1               | 0.4                 |              |             |            |
| Uterus      | 148         | 19               | 12.8                 | 4               | 2.7                 |              |             |            |
|             |             |                  |                      |                 |                     |              |             |            |
| Esophagus   | 44          | 1                | 2.3                  | 0               |                     |              |             |            |
| HEME-AML    | 36          | 1                | 2.8                  | 0               |                     |              |             |            |
| HEME-CLL    | 94          | 6                | 6.4                  | 0               |                     |              |             |            |
| Kidney      | 243         | 12               | 4.9                  | 0               |                     |              |             |            |
| Large bowel | 460         | 34               | 7.4                  | 1               | 0.2                 |              |             |            |
| Larynx      | 24          | 2                | 8.3                  | 0               |                     |              |             |            |
| Liver       | 30          | 1                | 3.3                  | 0               |                     |              |             |            |
| Lung        | 603         | 50               | 8.3                  | 5               | 0.8                 |              |             |            |
| Oral cavity | 30          | 1                | 3.3                  | 0               |                     |              |             |            |
| Pancreas    | 161         | 7                | 4.3                  | 0               |                     |              |             |            |
| Peritoneum  | 9           | 2                | 22.2                 | 0               |                     |              |             |            |
| Prostate    | 52          | 5                | 9.6                  | 0               |                     |              |             |            |
| Rectum-anus | 72          | 4                | 5.6                  | 1               | 1.4                 |              |             |            |
| Skin        | 209         | 11               | 5.3                  | 0               |                     |              |             |            |
| Soft tissue | 45          | 3                | 6.7                  | 0               |                     |              |             |            |
| Stomach     | 55          | 3                | 5.5                  | 0               |                     |              |             |            |
| Total       | 3305        | 236              |                      | 17              |                     |              |             |            |

\* Not listed tissue types (see sTable 1) do not have non-synonymous JAK2 mutations.

sTable 4: STAT1 mutations in the TCC project

|              | Total case* | NS mutation | NS mutation rate (%) | Truncation | Truncation rate (%) | Case                | NS mutation | Truncation |
|--------------|-------------|-------------|----------------------|------------|---------------------|---------------------|-------------|------------|
| Brain        | 79          | 2           | 2.5                  |            |                     |                     |             |            |
| Breast       | 427         | 8           | 1.9                  |            |                     |                     |             |            |
| Cervix       | 49          | 3           | 6.1                  |            |                     | <b>Combined GYN</b> | 632         | 23 (3.6%)  |
| Endometrium  | 200         | 8           | 4.0                  | 1          | 0.5                 |                     |             |            |
| Ovary        | 235         | 3           | 1.3                  |            |                     |                     |             |            |
| Uterus       | 148         | 9           | 6.1                  | 3          | 2                   |                     |             |            |
| Esophagus    | 44          | 1           | 2.3                  |            |                     |                     |             |            |
| HEME-CLL     | 94          | 2           | 2.1                  |            |                     |                     |             |            |
| Kidney       | 243         | 4           | 1.6                  | 1          | 0.4                 |                     |             |            |
| Large bowel  | 460         | 11          | 2.4                  |            |                     |                     |             |            |
| Liver        | 30          | 2           | 6.7                  |            |                     |                     |             |            |
| Lung         | 603         | 14          | 2.3                  | 1          | 0.2                 |                     |             |            |
| Pancreas     | 161         | 3           | 1.9                  |            |                     |                     |             |            |
| Skin         | 209         | 9           | 4.3                  |            |                     |                     |             |            |
| Soft tissue  | 45          | 2           | 4.4                  |            |                     |                     |             |            |
| Thyroid      | 12          | 1           | 8.3                  |            |                     |                     |             |            |
| <b>Total</b> | <b>3039</b> | <b>82</b>   |                      | <b>6</b>   |                     |                     |             |            |

\*Not listed tissue types (see sTable 1) do not have non-synonymous STAT1 mutations.

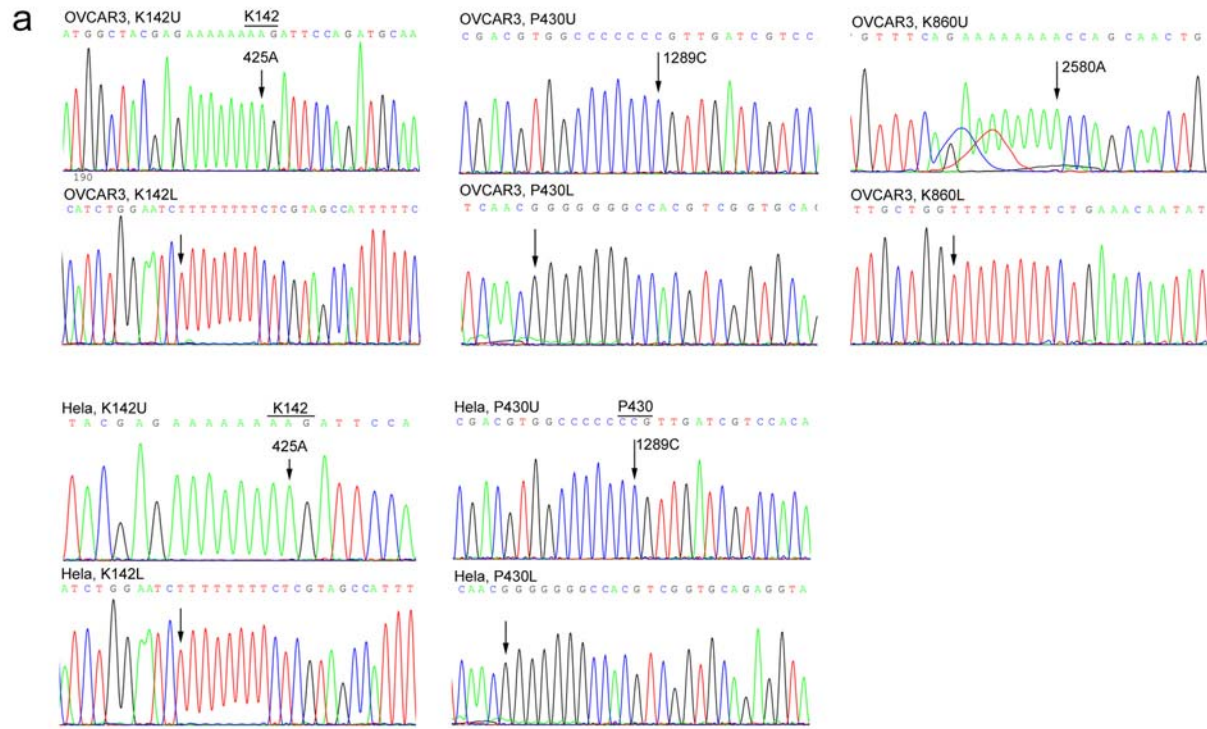

sFig. 1, part a

**b**

HEC1B, CCLE igv\_snapshot

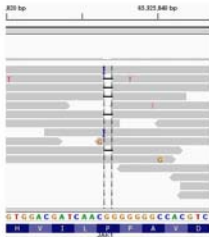

HEC1B, P430

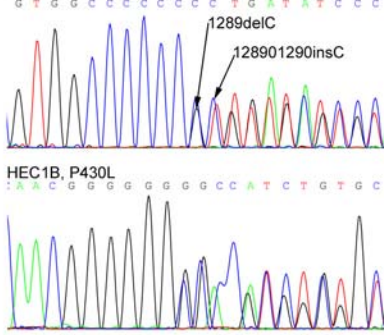

HEC1B, P430L

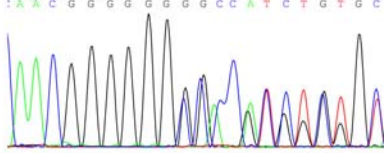

**d**

TOV21G, CCLE igv\_snapshot

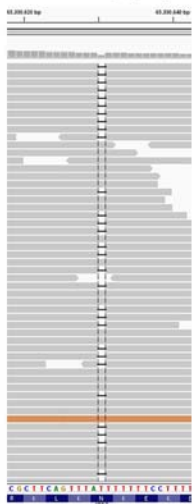

TOV21G, N339U

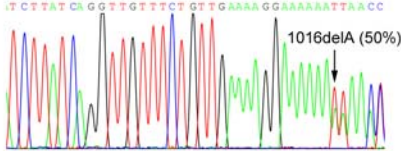

TOV21G, N339L

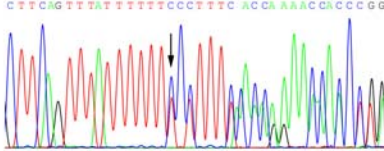

**c**

TOV21G, CCLE igv\_snapshot

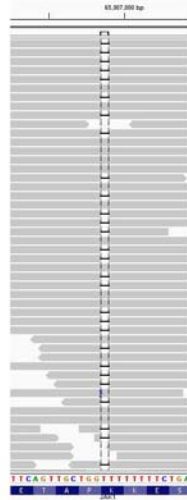

TOV21G, K860U

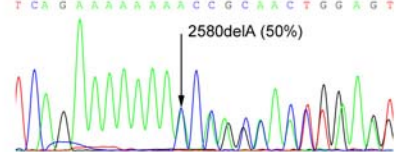

TOV21G, K860L

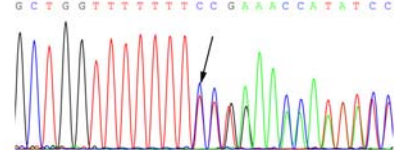

**e**

MFE296, CCLE igv\_snapshot

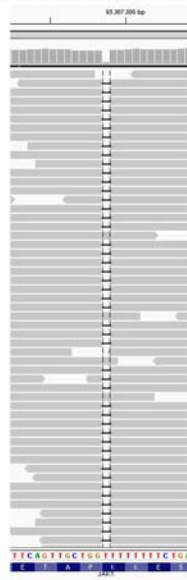

MFE296, K860U

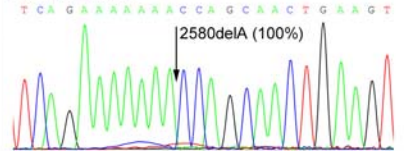

MFE296, K860L

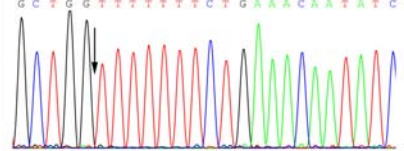

sFig.1, part b

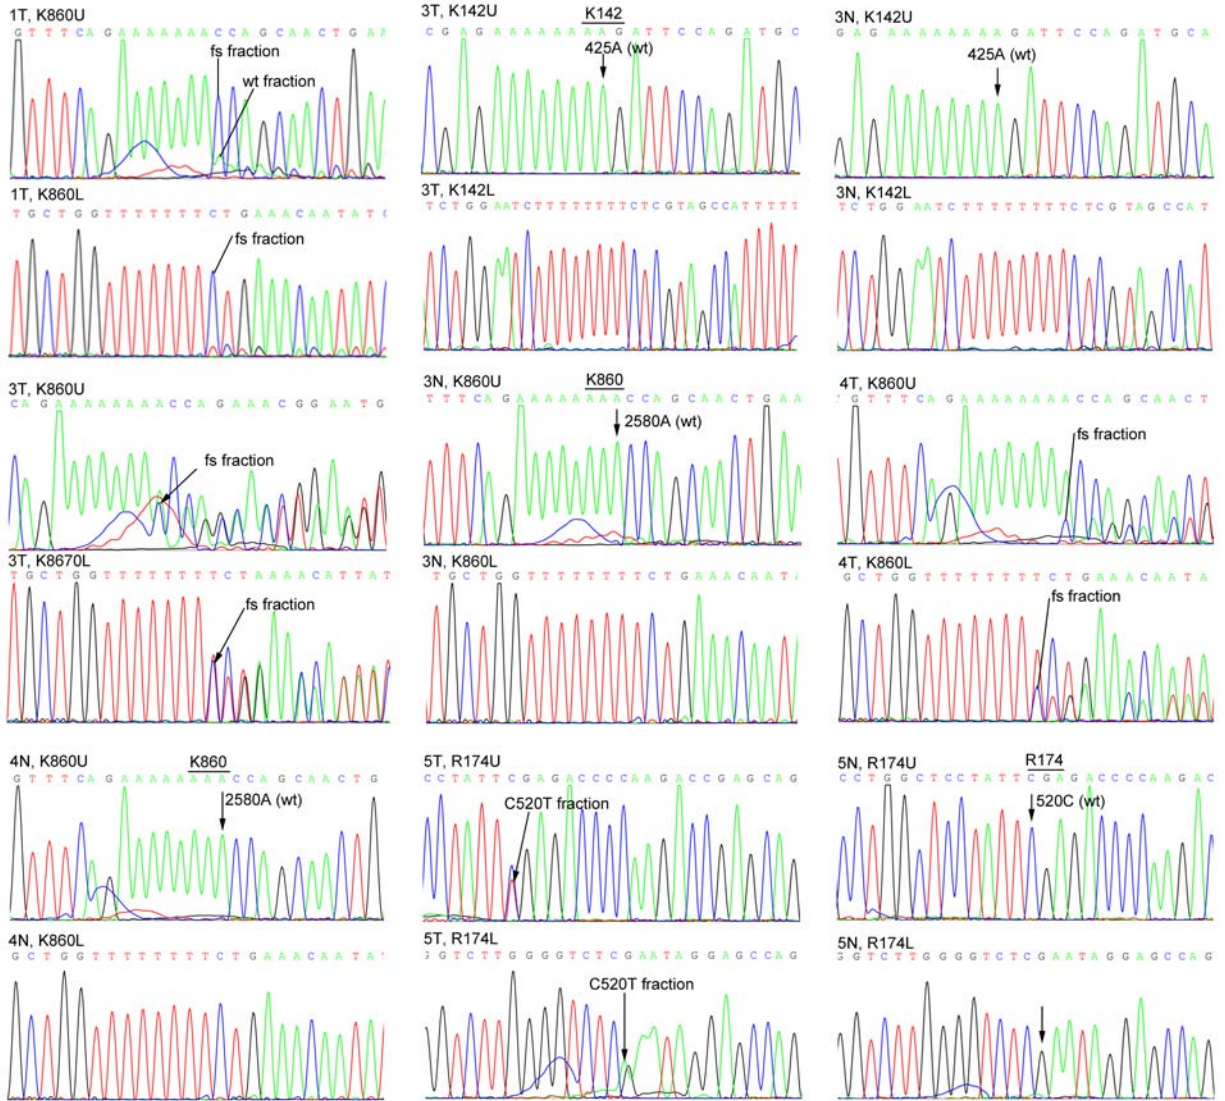

sFig. 2, part a



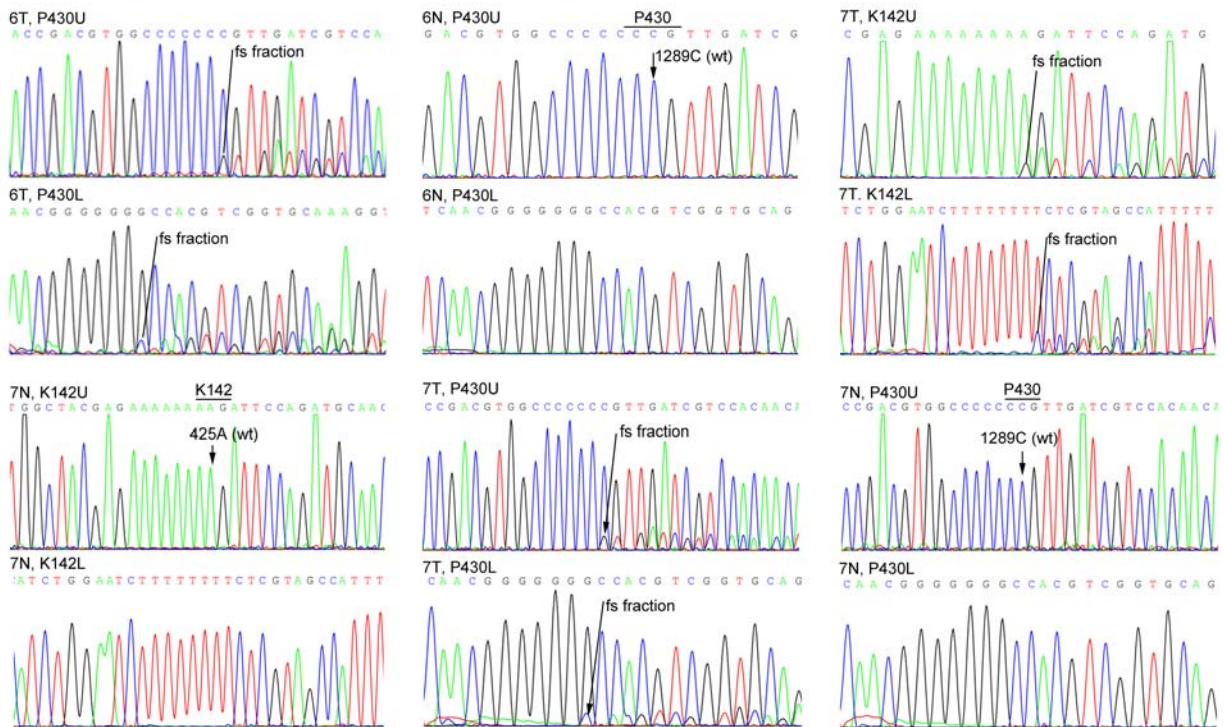

sFig. 2, part b

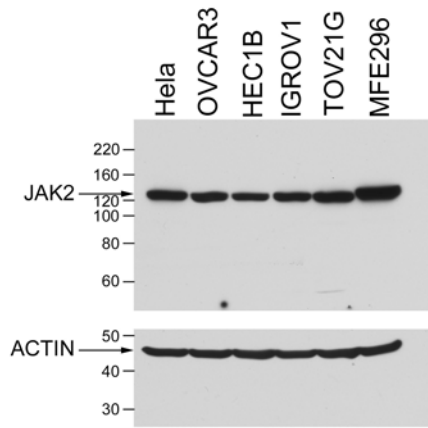

sFig. 3

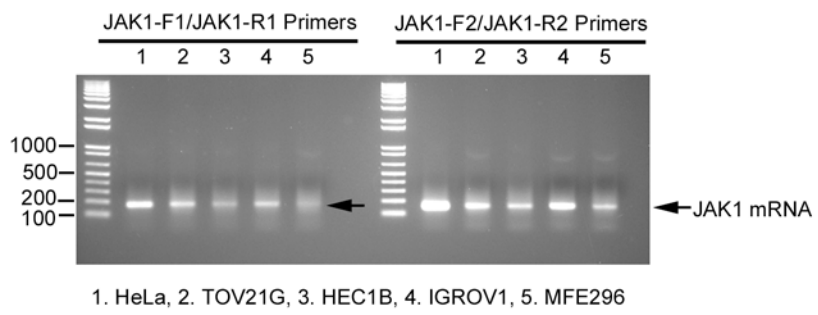

sFig. 4

## **Supplementary figure legends**

**sFigure 1. Sanger sequencing JAK1 in cancer cell lines.** (a) Wildtype JAK1 in OVCAR3 and HeLa cells. (b) P430 site in HEC1B cells. (c-d) K860 and N339 sites in TOV21G cells. (e) K860 site in MFE296 cells. Genomic DNA was isolated from these cells and coding regions across amino acid K142, N339, P430, or K860 were amplified by PCR and then sequenced. The DNA sequencing spectra in both strands are shown in each panel. Also shown are snapshots of sequence alignment of CCLE exome sequencing data of HEC1B, TOV21G, and MFE296 cells across N339fs, P430fs or K860fs sites.

**sFigure 2. DNA sequencing data of tumor and matched normal tissues.** The DNA sequencing spectra across mutation sites in tumors and the corresponding regions in normal tissues are shown in both strands.

**sFigure 3. Analysis of JAK2 protein in GYN cancer cell lines.** Cell lysates from indicated cell lines were analyzed by immunoblotting with indicated antibodies.

**sFigure 4. RT-PCR analysis of JAK1 transcripts in GYN cancer cell lines.** RT-PCR was performed with ~800 ng of total RNA from each cell line and two different primer pairs. The RT-PCR products were analyzed on a 1.2% agarose gel.
